# Supplementary material
Source: Springer Nature journal article supplement (https://www.springermedizin.de/resource/supplementary/12985_2014_2401_MOESM4_ESM.pdf/9607034)

**A**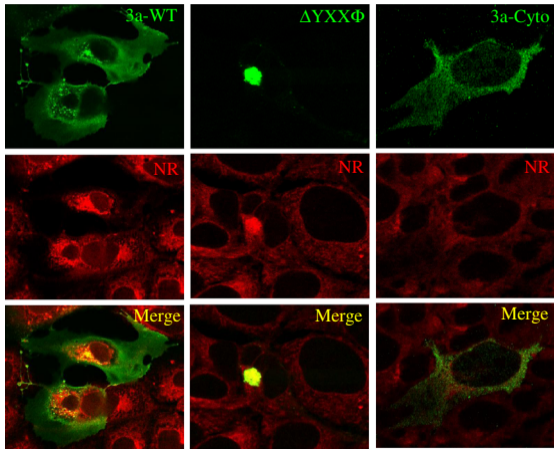**B**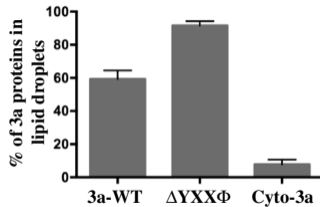

Supplement: MOESM4 [file 9607034]
